# Supplementary figures and images for: Directed induction of alveolar type I cells derived from pluripotent stem cells via Wnt signaling inhibition
Source: PubMed Central journal article supplement — Stem Cells. 2020 Nov 26;39(2):156–69. doi: 10.1002/stem.3302 (PMC7898721; doi:10.1002/stem.3302), 2020-11-26

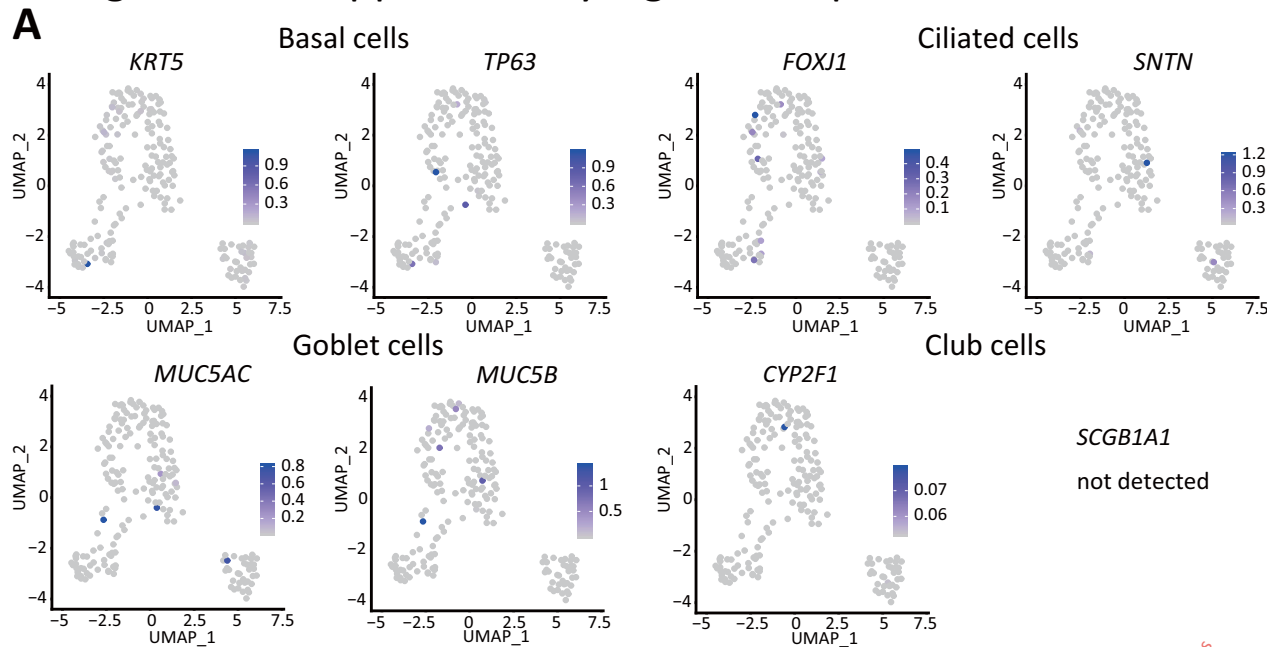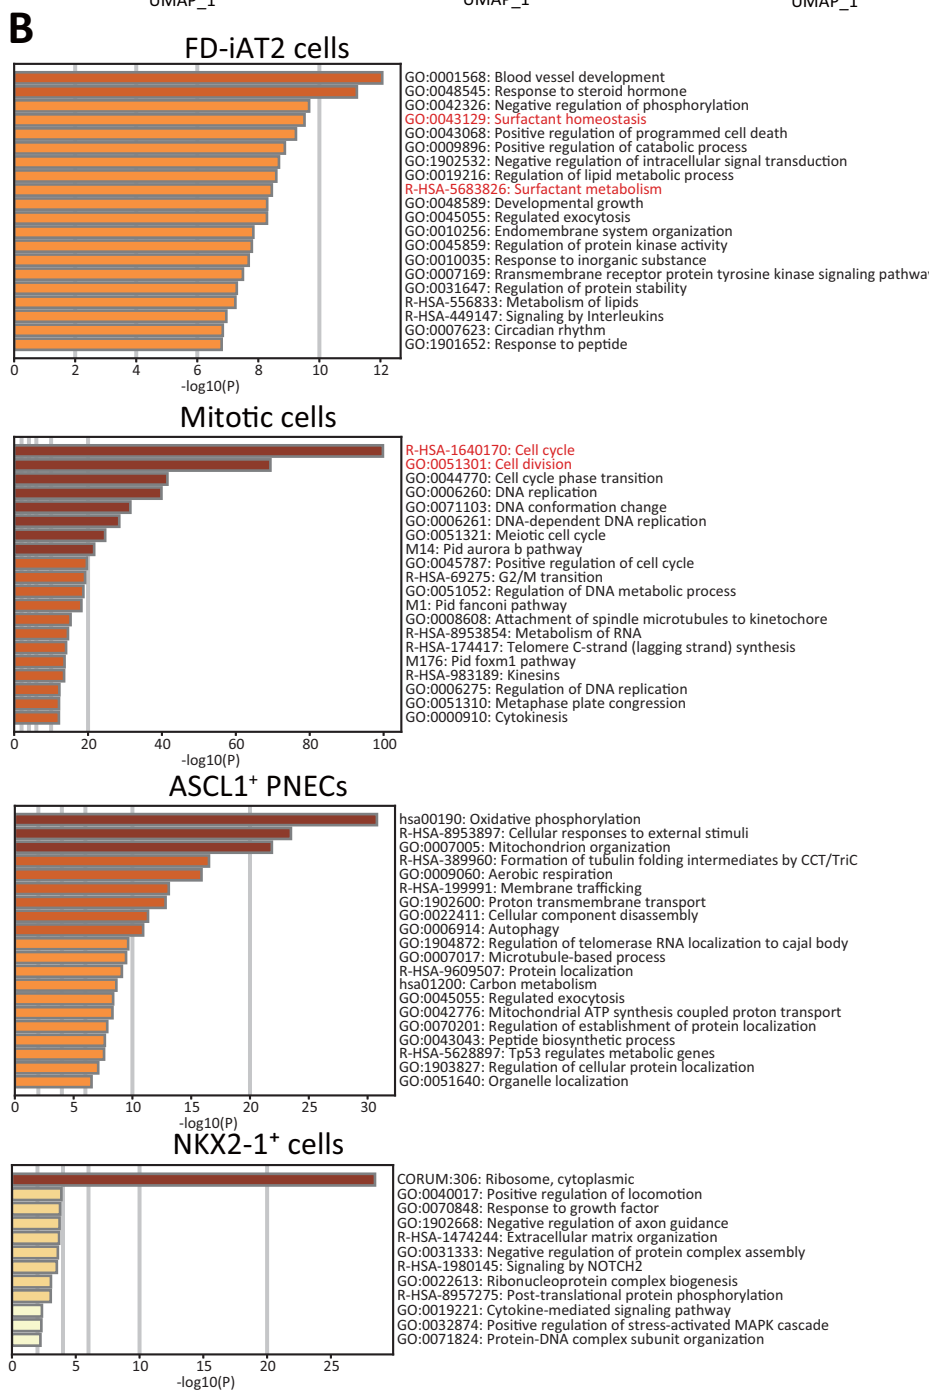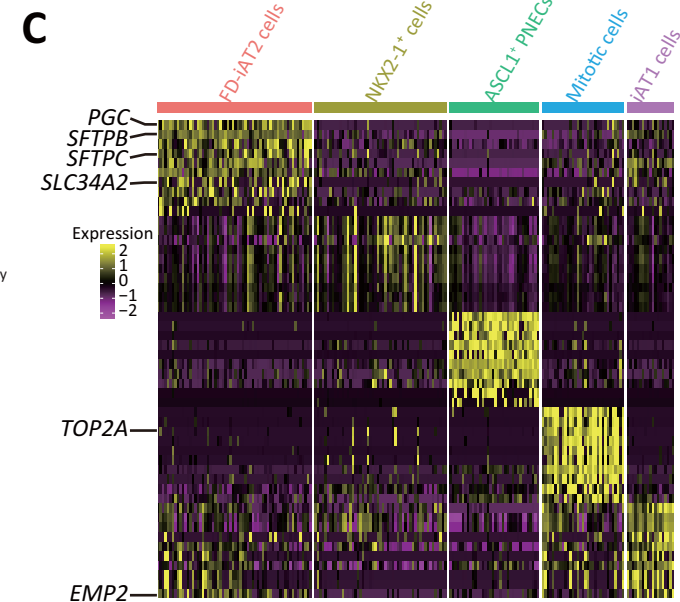

Supplement: STEM-39-156-s002.pdf [file STEM-39-156-s002.pdf]

Kanagaki et al. Supplementary Figure 2, top

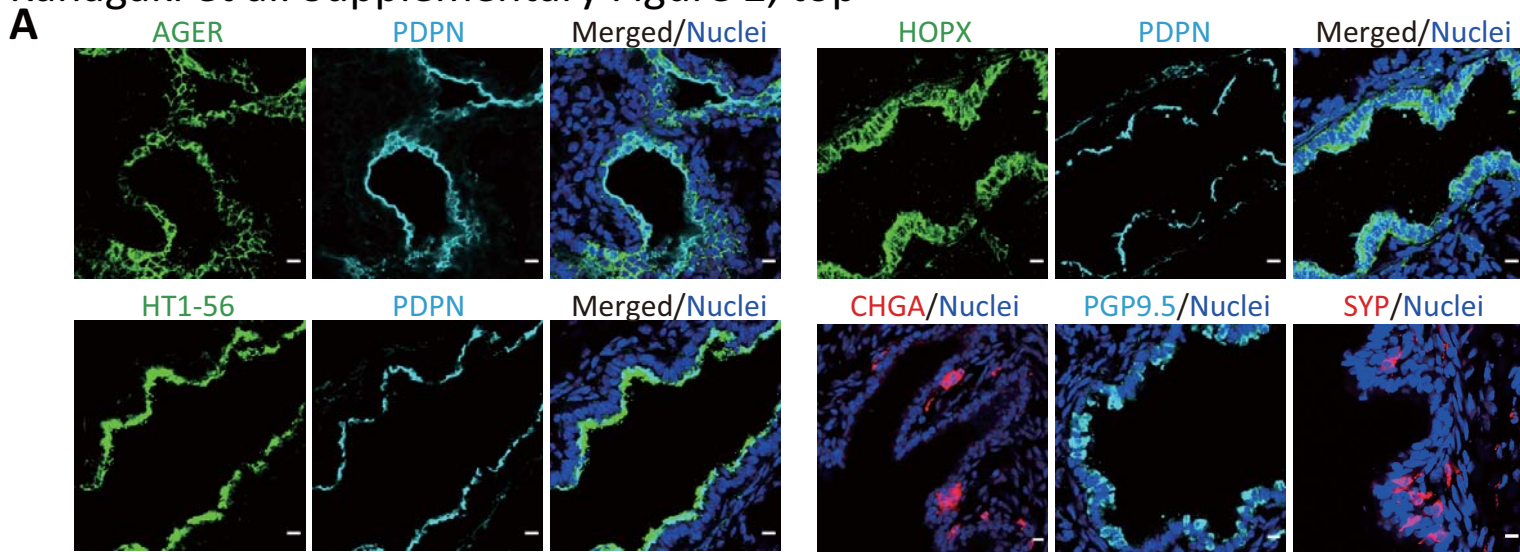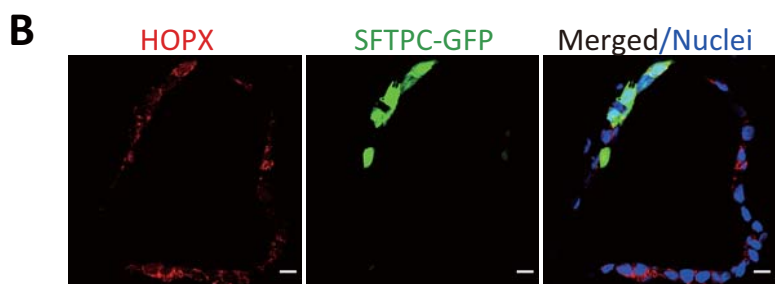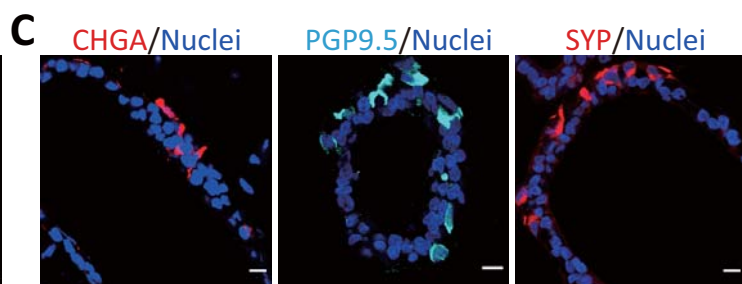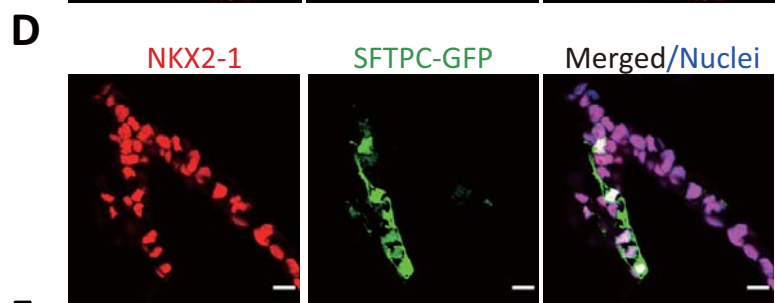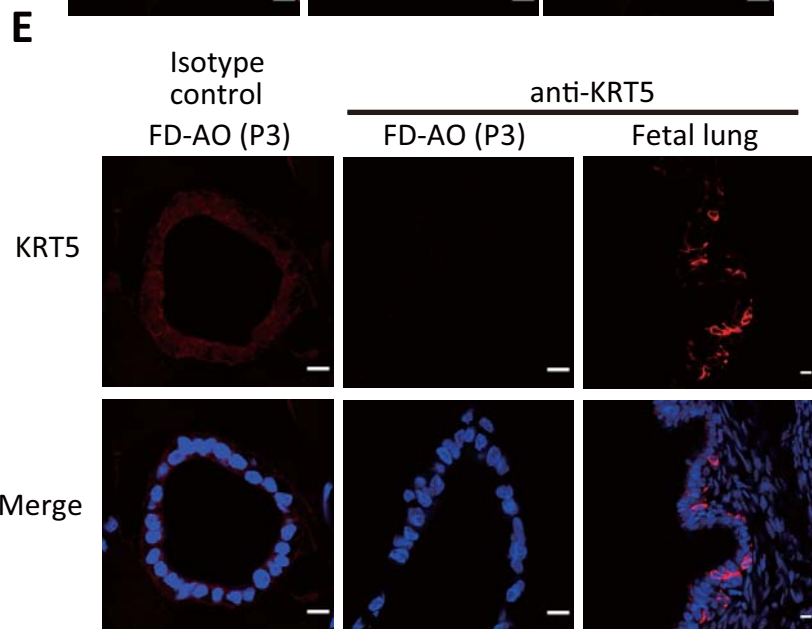

Supplement: STEM-39-156-s003.pdf [file STEM-39-156-s003.pdf]
